# Supplementary material
Source: PubMed Central journal article supplement (PMC5046229)

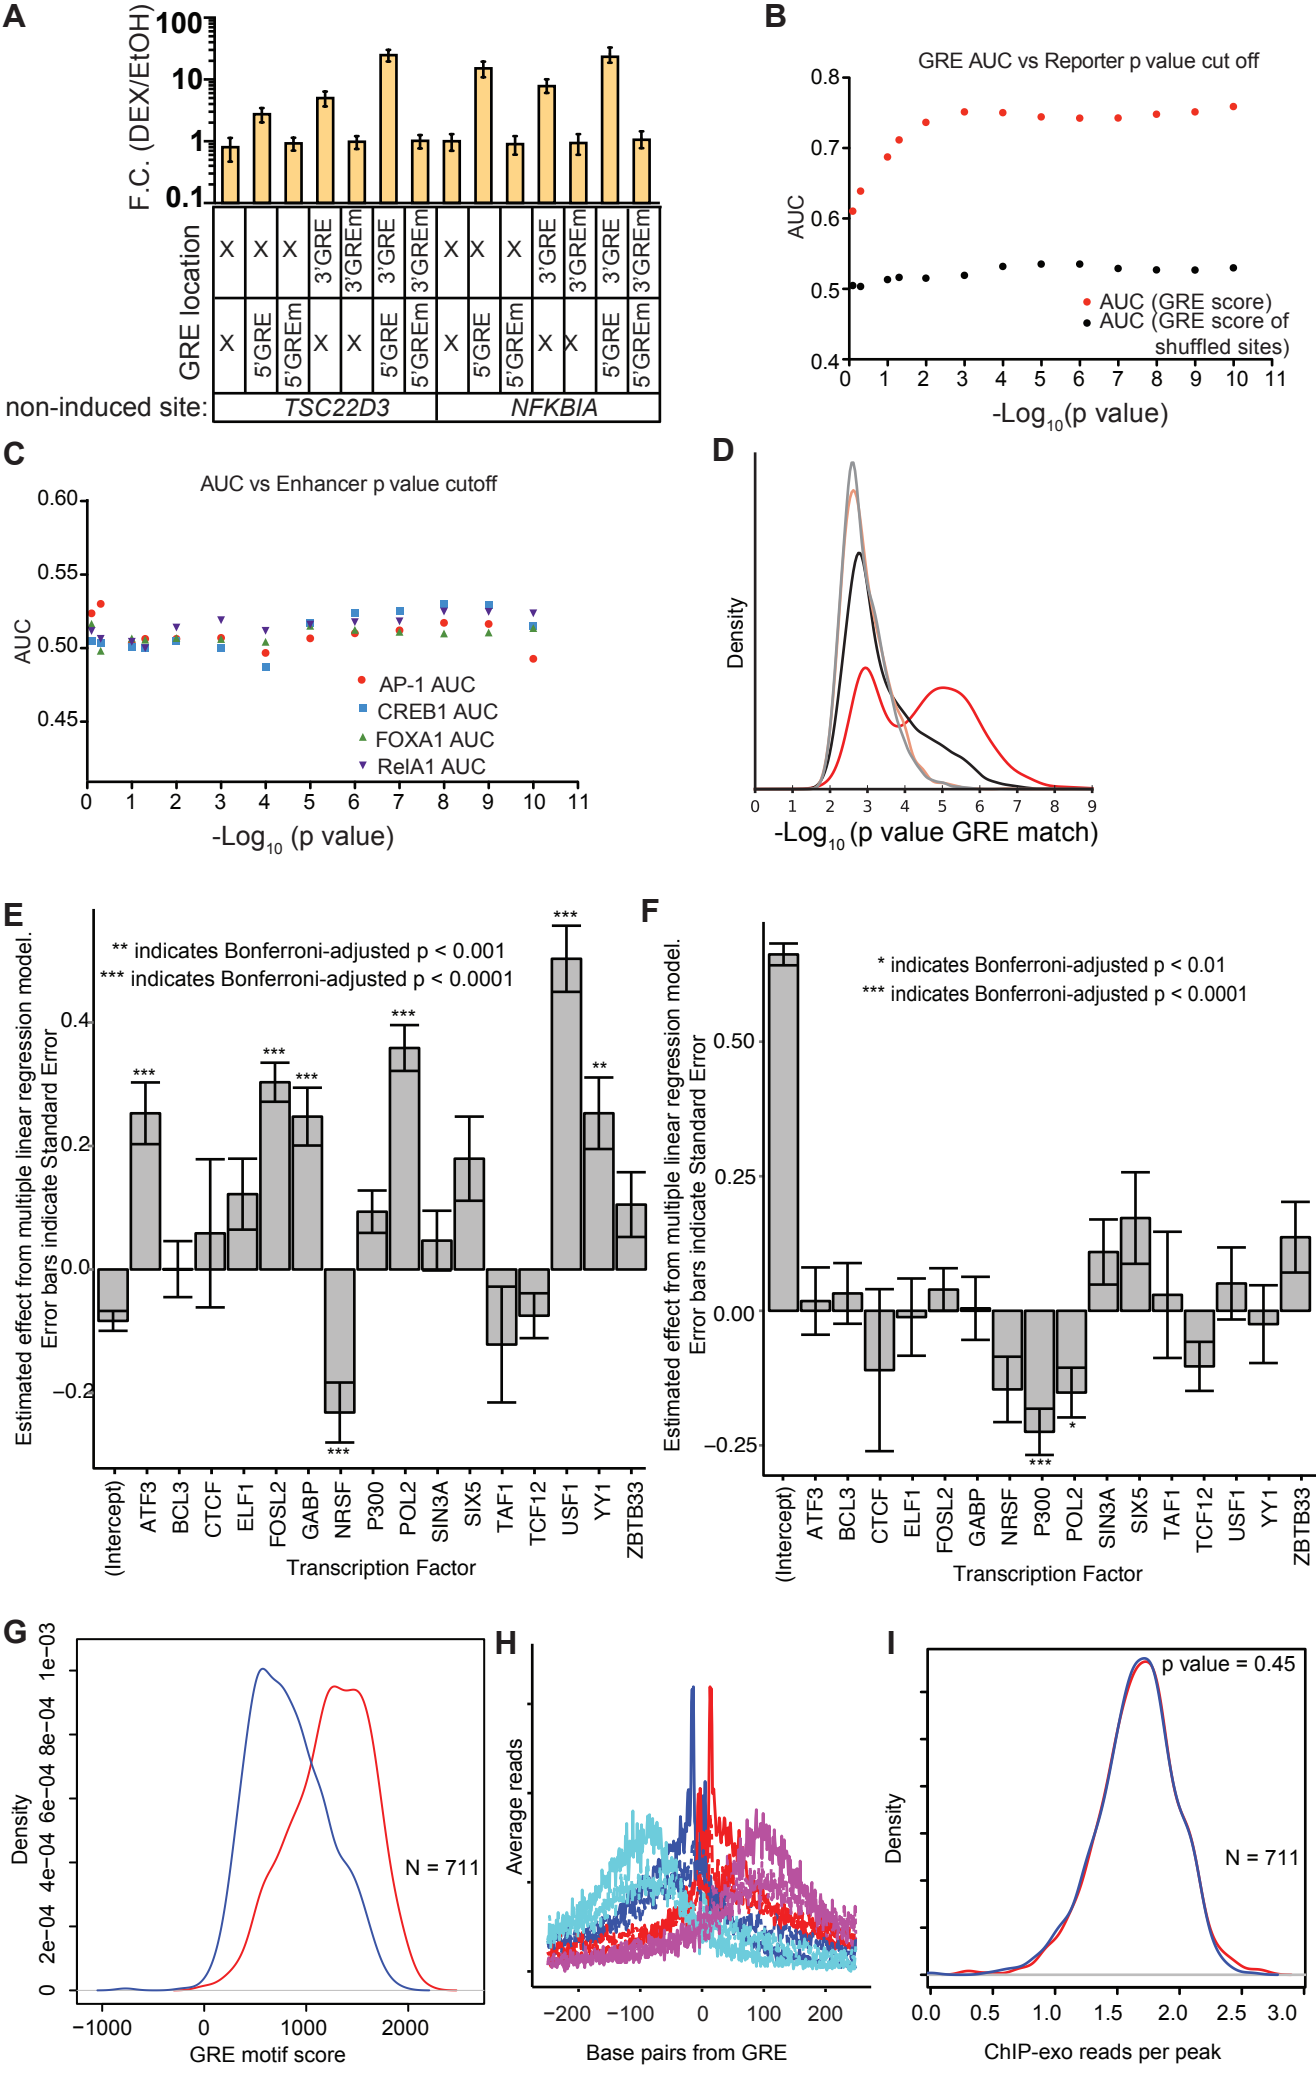

Supplement: NIHMS807819-supplement-11.pdf [file NIHMS807819-supplement-11.pdf]

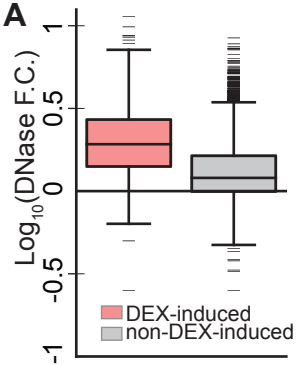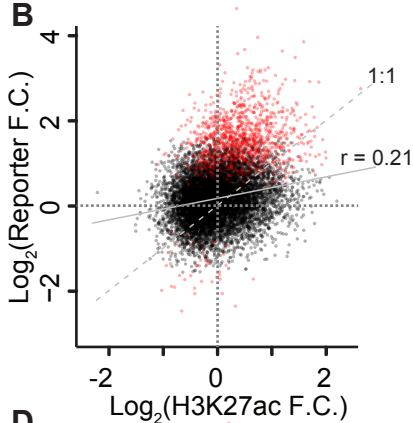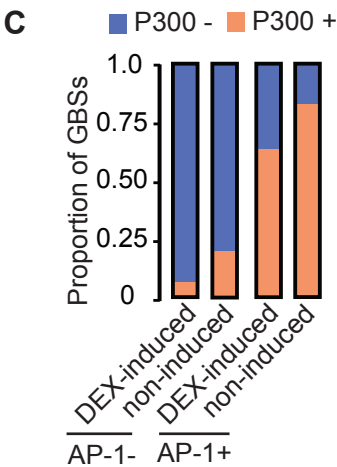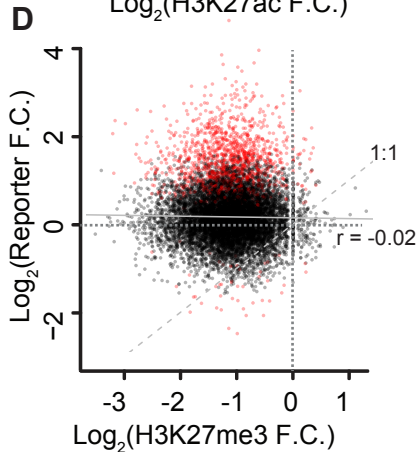

Supplement: NIHMS807819-supplement-12.pdf [file NIHMS807819-supplement-12.pdf]

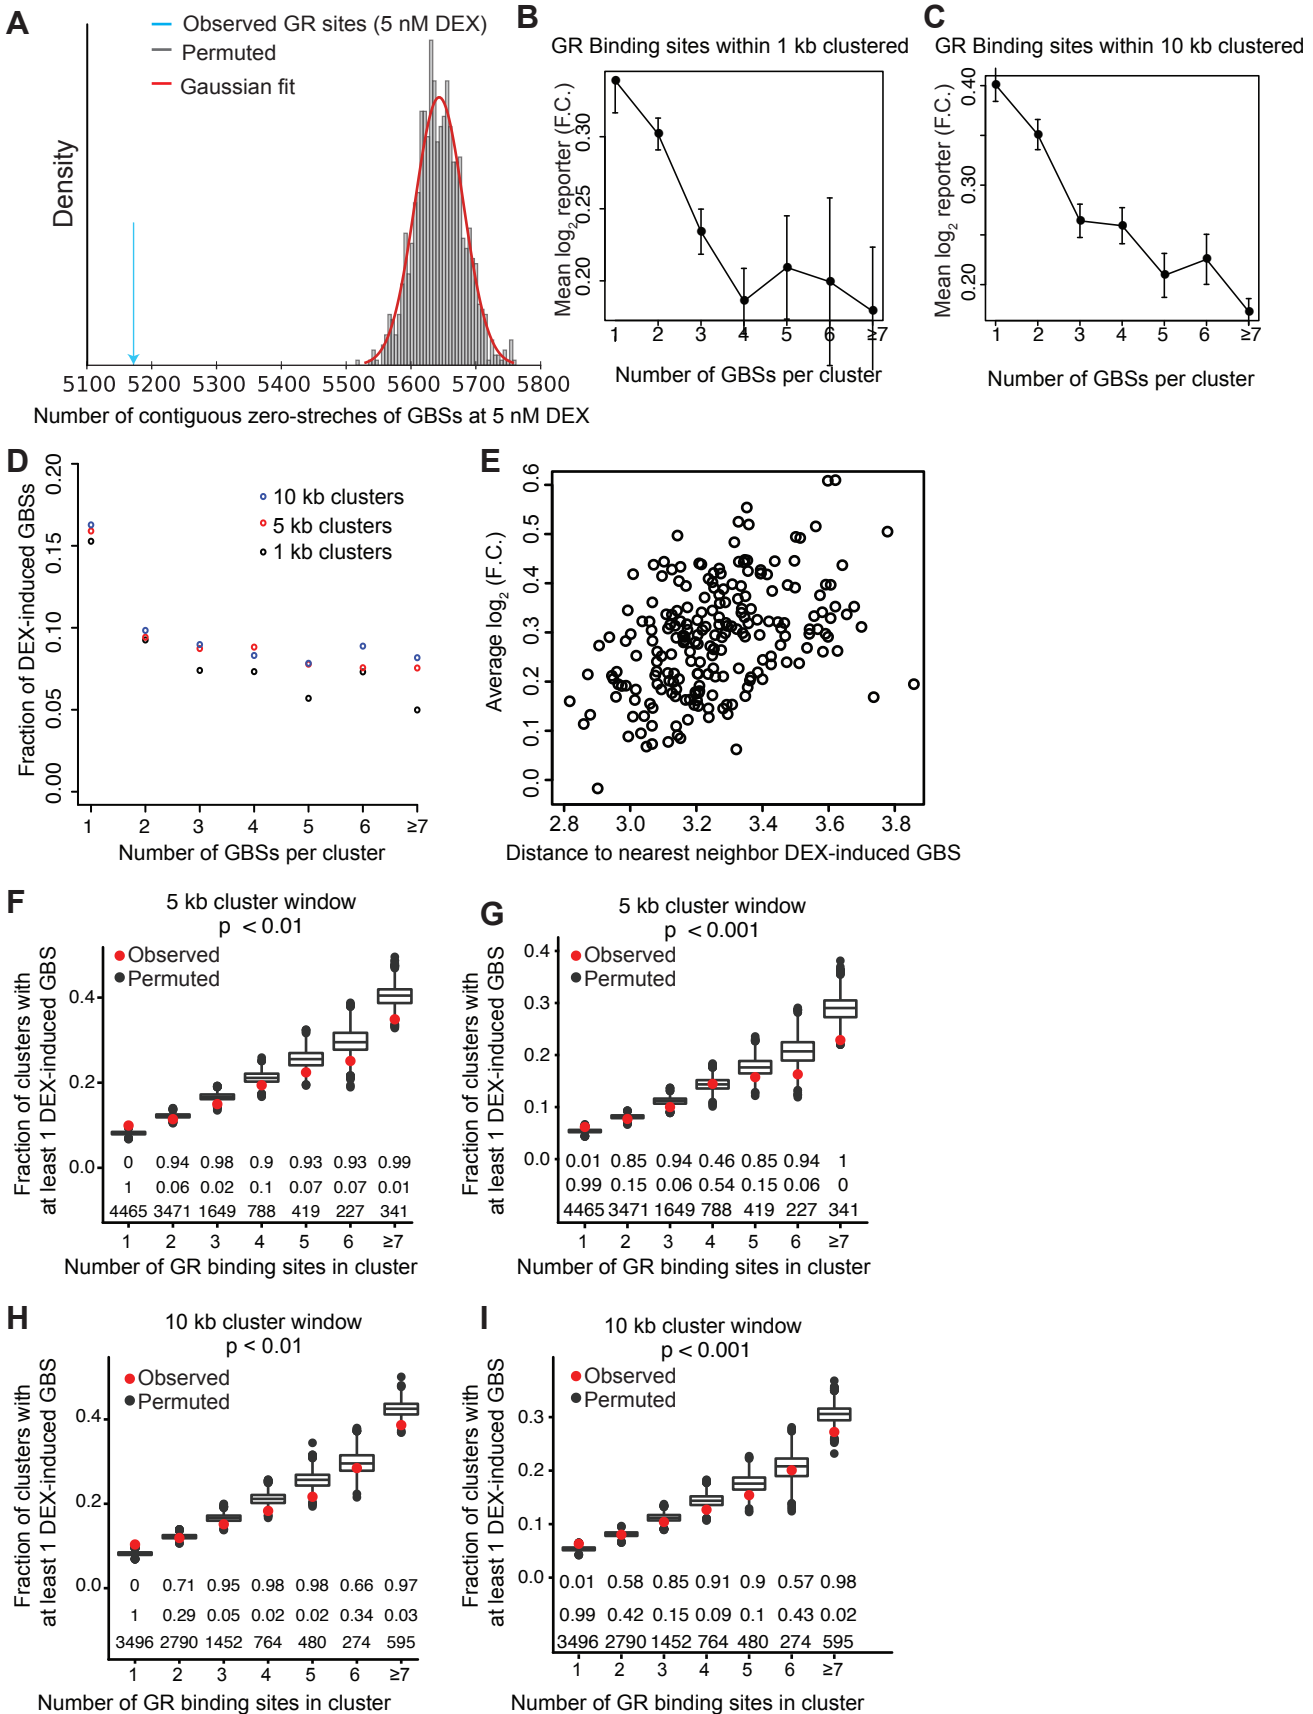

Supplement: NIHMS807819-supplement-13.pdf [file NIHMS807819-supplement-13.pdf]

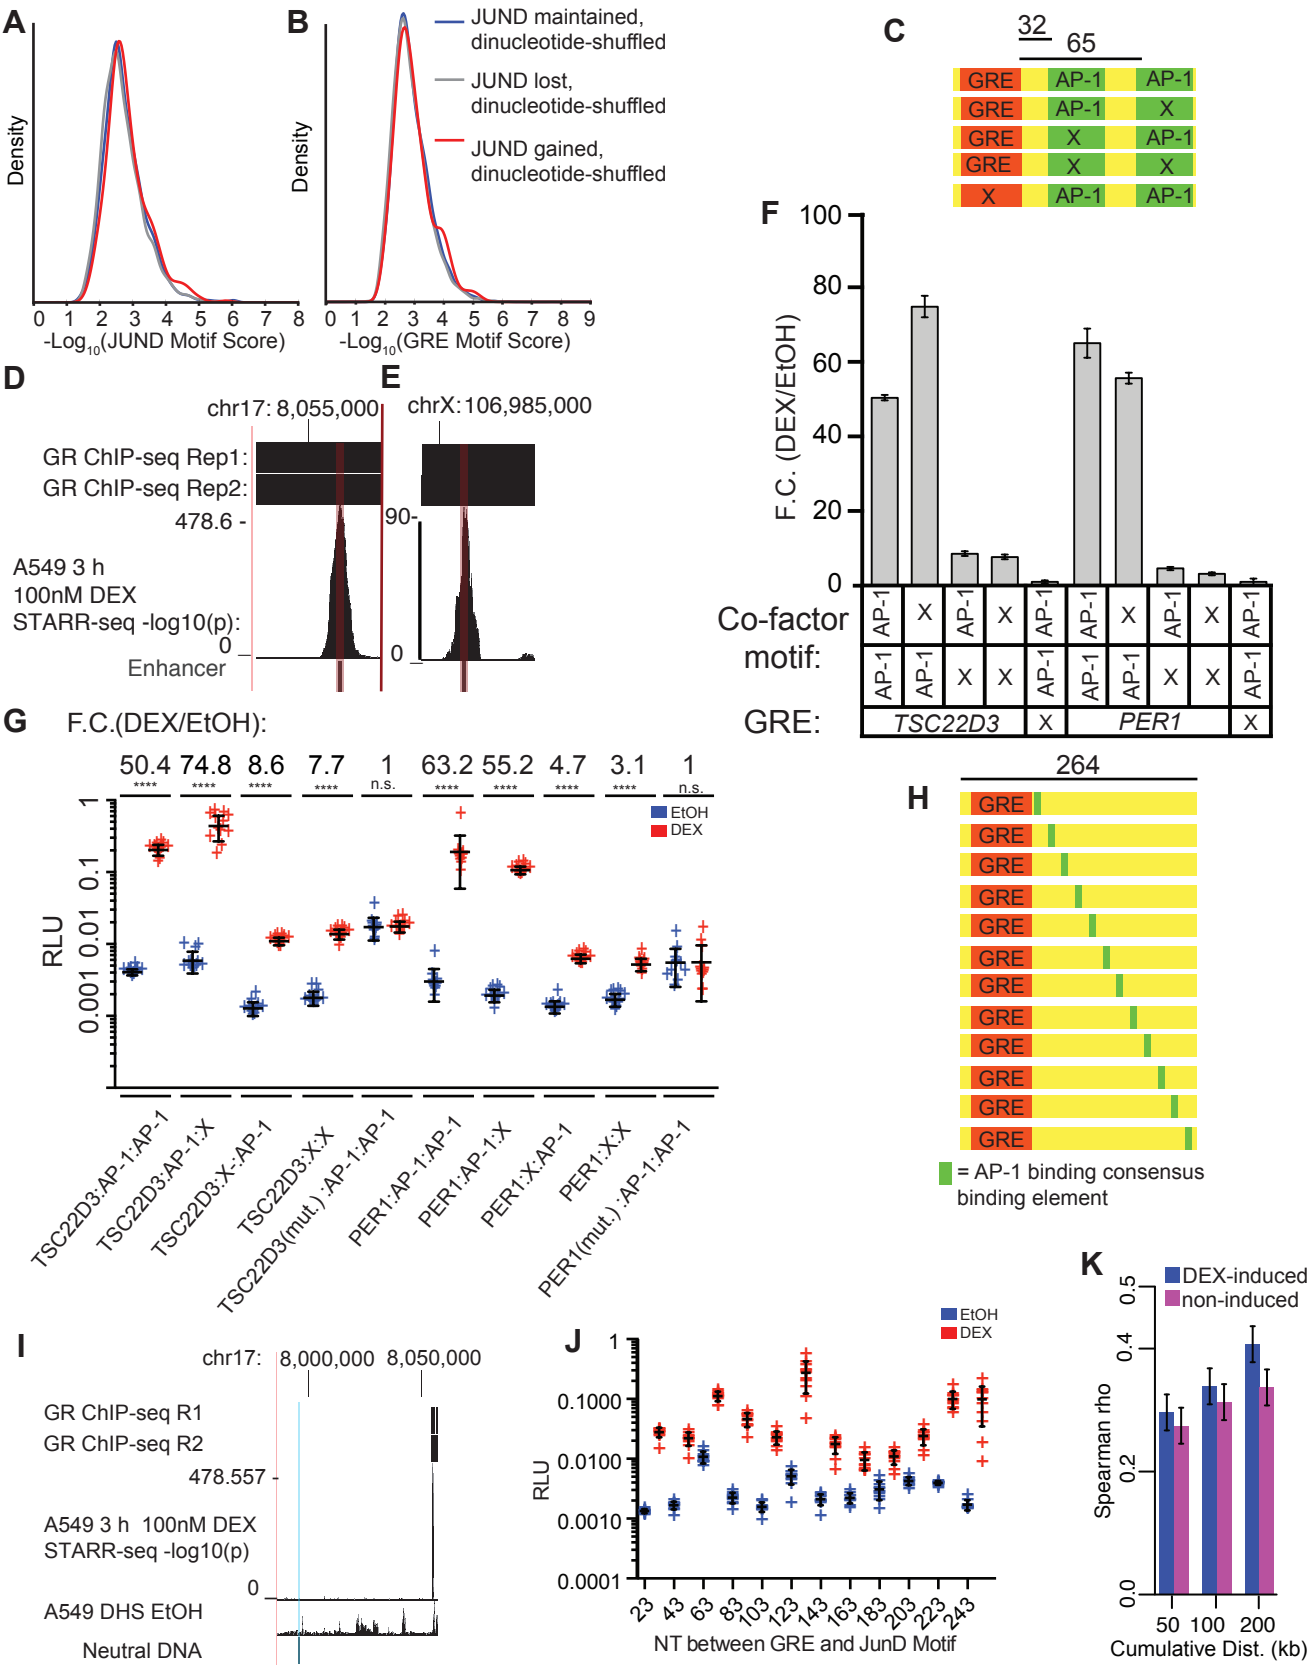

Supplement: NIHMS807819-supplement-14.pdf [file NIHMS807819-supplement-14.pdf]

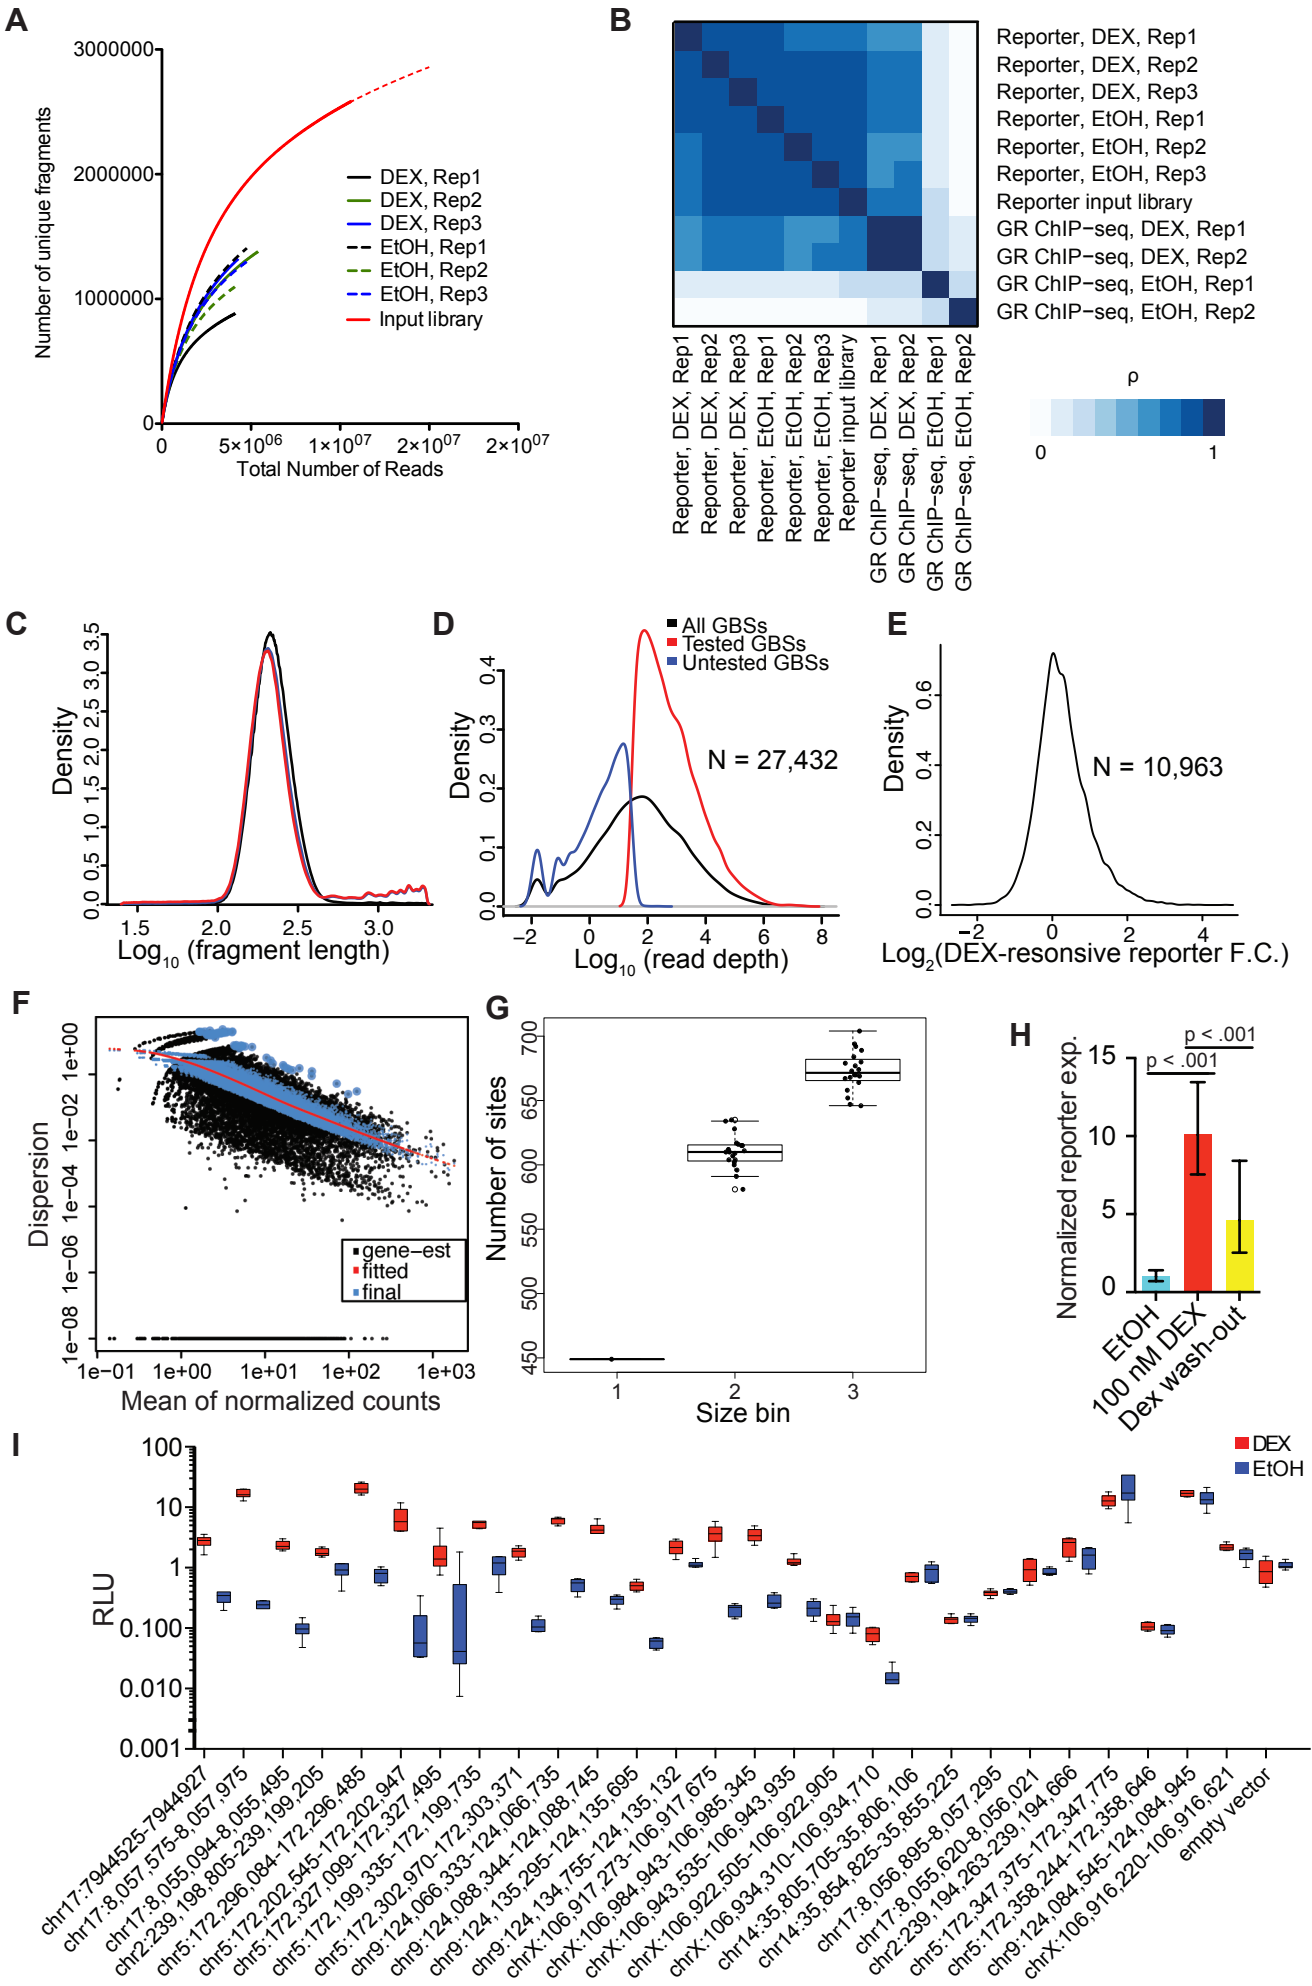

Supplement: NIHMS807819-supplement-9.pdf [file NIHMS807819-supplement-9.pdf]
